# Supplementary material for: Survival analyses from the CENTAUR trial in amyotrophic lateral sclerosis: Evaluating the impact of treatment crossover on outcomes
Source: PubMed Central journal article supplement — Muscle Nerve. 2022 May 31;66(2):136–41. doi: 10.1002/mus.27569 (PMC9540225; doi:10.1002/mus.27569), 2022-05-31
Supplement: MUS-66-136-s001.pdf [file MUS-66-136-s001.pdf]

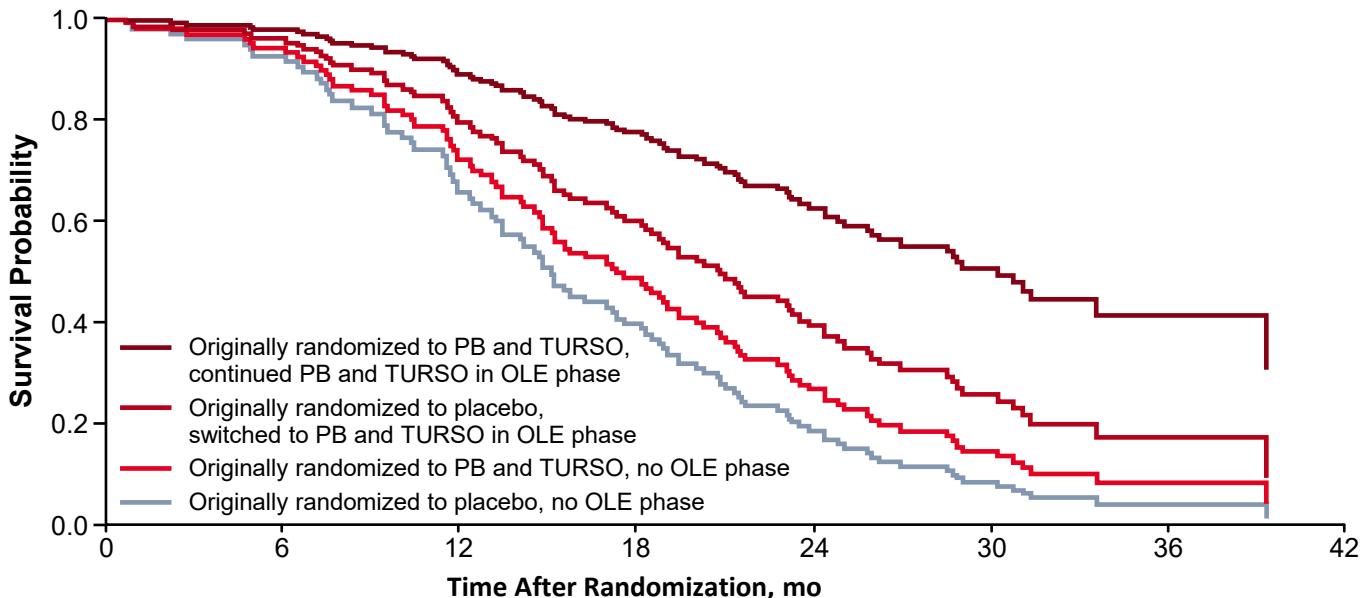

| Subgroup            |            | n  | Mean PB and TURSO Exposure Duration, mo | Median (95% CI) Survival Duration, mo | HR (95% CI) <sup>a</sup> | P Value <sup>a</sup> |
|---------------------|------------|----|-----------------------------------------|---------------------------------------|--------------------------|----------------------|
| Randomized Phase    | OLE Phase  |    |                                         |                                       |                          |                      |
| <b>PB and TURSO</b> | <b>Yes</b> | 56 | 15.6                                    | 30.2 (24.9–NR)                        | NA                       | NA                   |
| <b>Placebo</b>      | <b>Yes</b> | 34 | 7.5                                     | 20.8 (17.2–28.7)                      | 2.00 (1.14–3.49)         | .015                 |
| <b>PB and TURSO</b> | <b>No</b>  | 33 | 2.7                                     | 17.4 (14.6–23.1)                      | 2.81 (1.66–4.74)         | .0001                |
| <b>Placebo</b>      | <b>No</b>  | 14 | 0                                       | 15.2 (12.4–24.9)                      | 3.61 (1.75–7.44)         | .0005                |
