# Supplementary material for: Survival analyses from the CENTAUR trial in amyotrophic lateral sclerosis: Evaluating the impact of treatment crossover on outcomes
Source: PubMed Central journal article supplement — Muscle Nerve. 2022 May 31;66(2):136–41. doi: 10.1002/mus.27569 (PMC9540225; doi:10.1002/mus.27569), 2022-05-31
Supplement: MUS-66-136-s003.pdf [file MUS-66-136-s003.pdf]

Randomized Phase

OLE Phase

≤40 months

**July 2020**

Original survival assessment

Updated dataset from original publication that includes 1 additional participant whose vital status was ascertained since original assessment

**March 2021**

Final survival assessment

Analysis includes a more mature dataset. As such, the number of individuals at risk at each timepoint may increase as more participants reach that timing milestone

## Survival Analyses (Time To All-Cause Death)

| Analysis          | Population(s)                                                                              | Comparators                                                                                                                                                                                                                                                                                                                                                                                                                                        |
|-------------------|--------------------------------------------------------------------------------------------|----------------------------------------------------------------------------------------------------------------------------------------------------------------------------------------------------------------------------------------------------------------------------------------------------------------------------------------------------------------------------------------------------------------------------------------------------|
| ITT               | ITT <sup>a</sup>                                                                           | <ul style="list-style-type: none"> <li>Group originally randomized to PB and TURSO vs group originally randomized to placebo</li> </ul>                                                                                                                                                                                                                                                                                                            |
| RPSFTM            | <ul style="list-style-type: none"> <li>ITT<sup>a</sup></li> <li>RPSFTM Adjusted</li> </ul> | <ul style="list-style-type: none"> <li>Group originally randomized to PB and TURSO (ITT) vs group originally randomized to placebo (RPSFTM adjusted)</li> </ul>                                                                                                                                                                                                                                                                                    |
| Subgroup analysis | ITT <sup>a</sup>                                                                           | <ul style="list-style-type: none"> <li>Subgroup originally randomized to PB and TURSO that entered the OLE phase vs:               <ul style="list-style-type: none"> <li>Subgroup originally randomized to placebo that entered the OLE phase</li> <li>Subgroup originally randomized to PB and TURSO that did not enter the OLE phase</li> <li>Subgroup originally randomized to placebo that did not enter the OLE phase</li> </ul> </li> </ul> |
