# Supplementary material for: Survival analyses from the CENTAUR trial in amyotrophic lateral sclerosis: Evaluating the impact of treatment crossover on outcomes
Source: PubMed Central journal article supplement — Muscle Nerve. 2022 May 31;66(2):136–41. doi: 10.1002/mus.27569 (PMC9540225; doi:10.1002/mus.27569), 2022-05-31
Supplement: MUS-66-136-s004.pdf [file MUS-66-136-s004.pdf]

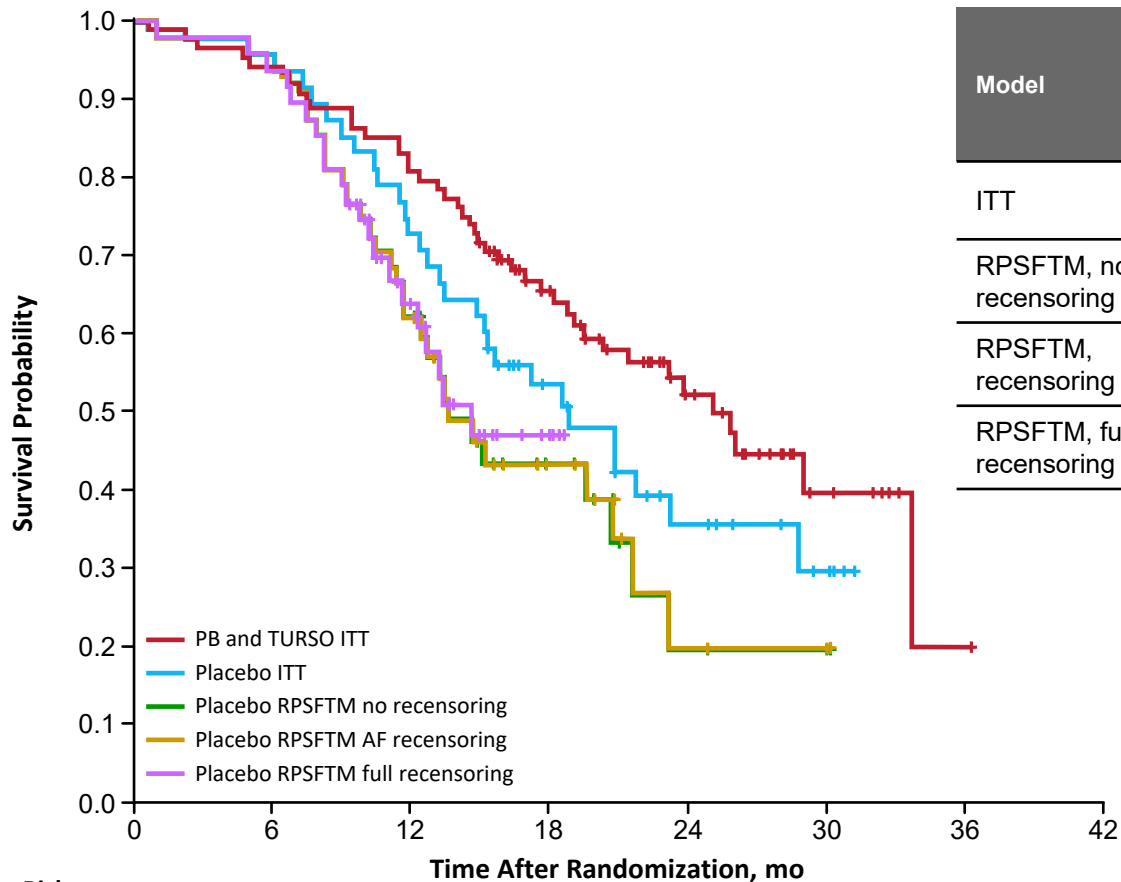

| Model                       | Median Survival Duration, mo |              | HR (95% CI)      | P Value |
|-----------------------------|------------------------------|--------------|------------------|---------|
|                             | Placebo                      | PB and TURSO |                  |         |
| ITT                         | 18.9                         | 25.8         | 0.57 (0.35–0.92) | .023    |
| RPSFTM, no recensoring      | 13.6                         | 25.8         | 0.37 (0.16–0.87) | .023    |
| RPSFTM, recensoring AF only | 13.6                         | 25.8         | 0.37 (0.16–0.87) | .023    |
| RPSFTM, full recensoring    | 14.8                         | 25.8         | 0.39 (0.18–0.88) | .023    |

|                                 | Number at Risk |    |    |    |    |    |    |    |  |
|---------------------------------|----------------|----|----|----|----|----|----|----|--|
|                                 | 0              | 6  | 12 | 18 | 24 | 30 | 36 | 42 |  |
| PB and TURSO ITT                | 89             | 84 | 72 | 46 | 23 | 7  | 1  | 0  |  |
| Placebo ITT                     | 48             | 46 | 35 | 20 | 10 | 4  | 0  | 0  |  |
| Placebo RPSFTM no recensoring   | 48             | 45 | 27 | 11 | 3  | 2  | 0  | 0  |  |
| Placebo RPSFTM AF recensoring   | 48             | 45 | 27 | 11 | 3  | 2  | 0  | 0  |  |
| Placebo RPSFTM full recensoring | 48             | 45 | 21 | 6  | 0  | 0  | 0  | 0  |  |
