# Supplementary material for: Survival analyses from the CENTAUR trial in amyotrophic lateral sclerosis: Evaluating the impact of treatment crossover on outcomes
Source: PubMed Central journal article supplement — Muscle Nerve. 2022 May 31;66(2):136–41. doi: 10.1002/mus.27569 (PMC9540225; doi:10.1002/mus.27569), 2022-05-31
Supplement: MUS-66-136-s005.pdf [file MUS-66-136-s005.pdf]

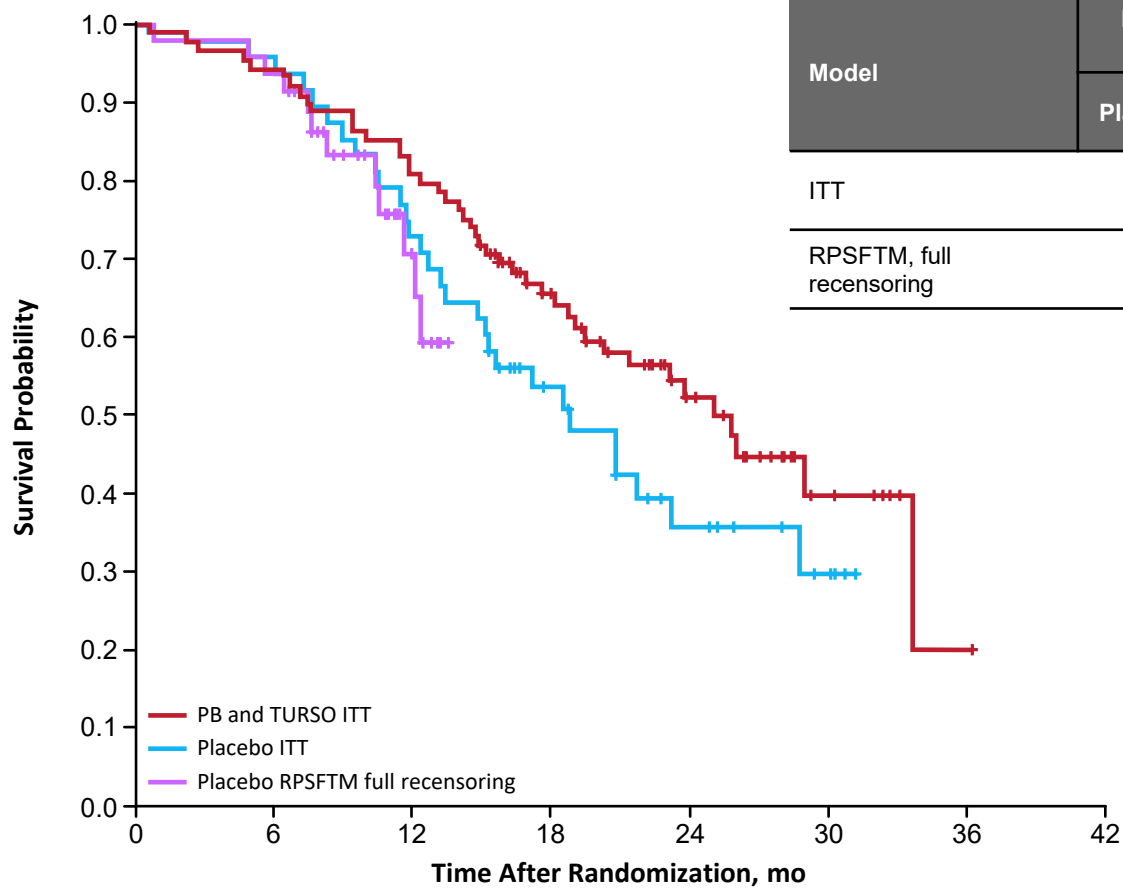

| Model                    | Median Survival Duration, mo |              | HR (95% CI)      | P Value |
|--------------------------|------------------------------|--------------|------------------|---------|
|                          | Placebo                      | PB and TURSO |                  |         |
| ITT                      | 18.9                         | 25.8         | 0.57 (0.35–0.92) | .023    |
| RPSFTM, full recensoring | NR                           | 25.8         | 0.44 (0.22–0.89) | .023    |

**Number at Risk**

|                                 |    |    |    |    |    |   |   |   |
|---------------------------------|----|----|----|----|----|---|---|---|
| PB and TURSO ITT                | 89 | 84 | 72 | 46 | 23 | 7 | 1 | 0 |
| Placebo ITT                     | 48 | 46 | 35 | 20 | 10 | 4 | 0 | 0 |
| Placebo RPSFTM full recensoring | 48 | 45 | 14 | 0  | 0  | 0 | 0 | 0 |
