# Supplementary material for: Survival analyses from the CENTAUR trial in amyotrophic lateral sclerosis: Evaluating the impact of treatment crossover on outcomes
Source: PubMed Central journal article supplement — Muscle Nerve. 2022 May 31;66(2):136–41. doi: 10.1002/mus.27569 (PMC9540225; doi:10.1002/mus.27569), 2022-05-31
Supplement: MUS-66-136-s007.pdf [file MUS-66-136-s007.pdf]

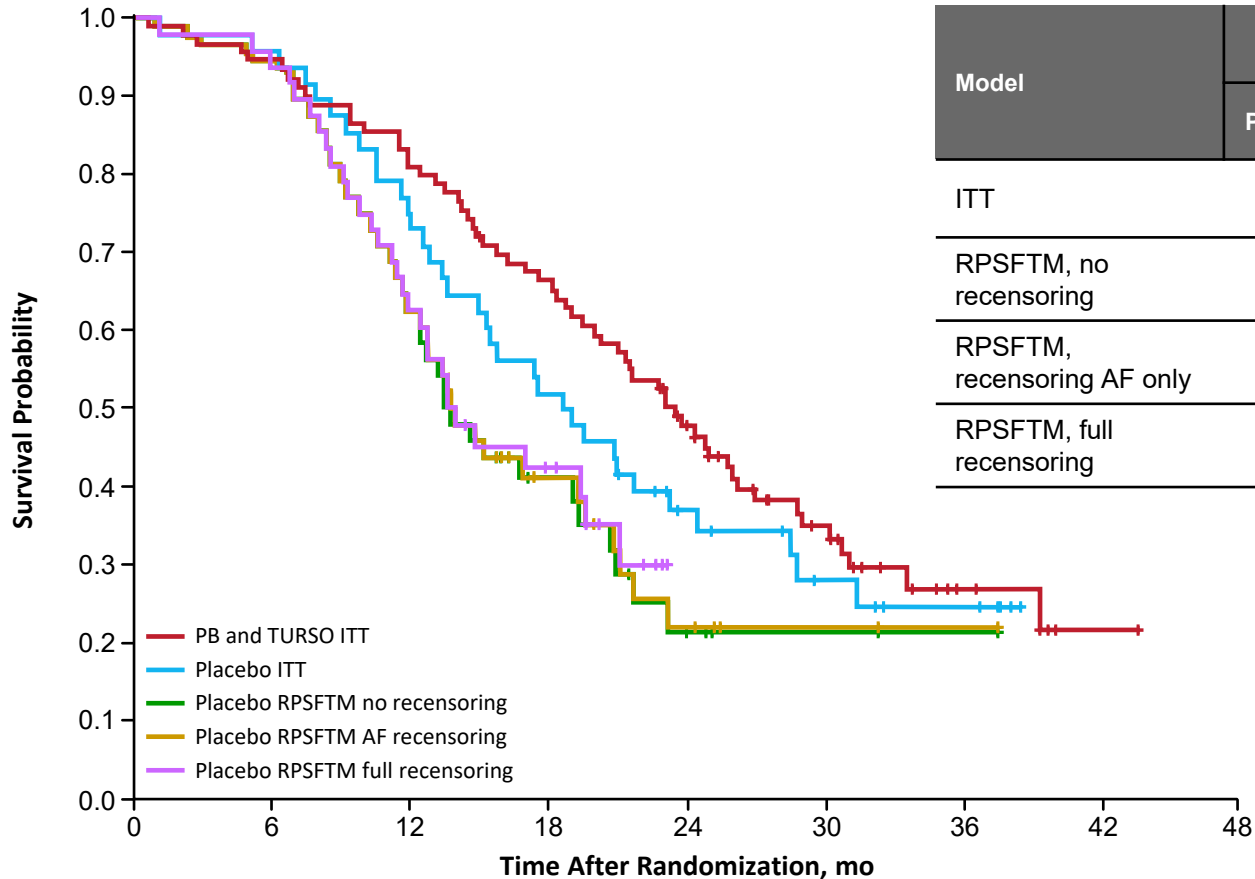

| Model                       | Median Survival Duration, mo |              | HR (95% CI)      | P Value |
|-----------------------------|------------------------------|--------------|------------------|---------|
|                             | Placebo                      | PB and TURSO |                  |         |
| ITT                         | 18.7                         | 23.5         | 0.64 (0.42–1.00) | .048    |
| RPSFTM, no recensoring      | 13.6                         | 23.5         | 0.40 (0.16–0.99) | .048    |
| RPSFTM, recensoring AF only | 13.7                         | 23.5         | 0.40 (0.16–0.99) | .048    |
| RPSFTM, full recensoring    | 13.7                         | 23.5         | 0.38 (0.14–0.99) | .048    |

**Number at Risk**

|                                 |    |    |    |    |    |    |   |   |   |
|---------------------------------|----|----|----|----|----|----|---|---|---|
| PB and TURSO ITT                | 89 | 84 | 72 | 58 | 38 | 21 | 6 | 1 | 0 |
| Placebo ITT                     | 48 | 46 | 35 | 25 | 14 | 8  | 5 | 0 | 0 |
| Placebo RPSFTM no recensoring   | 48 | 45 | 30 | 15 | 5  | 3  | 2 | 0 | 0 |
| Placebo RPSFTM AF recensoring   | 48 | 45 | 30 | 15 | 6  | 3  | 2 | 0 | 0 |
| Placebo RPSFTM full recensoring | 48 | 45 | 30 | 13 | 0  | 0  | 0 | 0 | 0 |
